# Supplementary material for: Myeloid signature reveals immune contexture and predicts the prognosis of hepatocellular carcinoma
Source: JCI journal article supplement (doi:10.1172/jci135048), 2020-06-04
Supplement: sd2 [file 2]

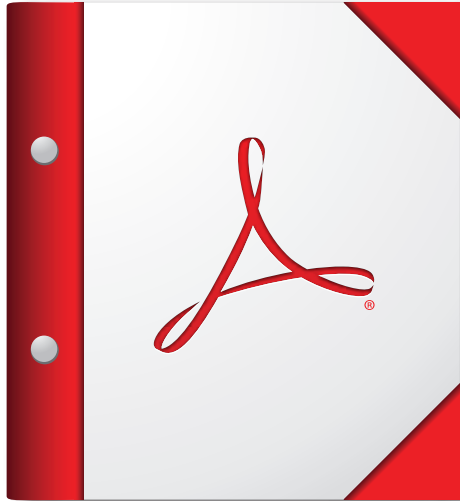

**For the best experience, open this PDF portfolio in  
Acrobat X or Adobe Reader X, or later.**

[Get Adobe Reader Now!](#)
